# Supplementary material for: Geographical variation in the diatom communities associated with loggerhead sea turtles (Caretta caretta)
Source: PubMed Central journal article supplement (PMC7390603; doi:10.1371/journal.pone.0236513), 2020-07-29
Supplement: pone.0236513.s001.pdf [file pone.0236513.s001.pdf]

**S1 Table. List of taxonomic publications used for identification of diatom taxa on loggerhead sea turtles.**

**Monographs**

Álvarez–Blanco I, Blanco S (2014) Benthic diatoms from Mediterranean coasts. *Bibl. Diatomol.* 60: 1–409

Foged N (1975) Some Littoral Diatoms from the Coast of Tanzania. *Bibl Phycol* 16: 1–127

Hein, MK, Winsborough, BM, Sullivan, MJ (2008) Bacillariophyta (diatoms) of the Bahamas *Iconographia Diatomologica* 19: 1–303

Loir M, Novarina G (2013) Marine *Mastogloia* Thwaites ex W.Sm. and *Stigmaphora* Wallich species from the French Lesser Antilles. *Diatom Monogr* 16: 1–133

Witkowski A, Lange–Bertalot H, Metzeltin D (2000) Diatom Flore of Marine Coasts I. *Icon Diatomol* 7: 1–925

**Articles**

Ashworth MP, Ruck EC, Lobban CS, Romanovicz DK, Theriot EC (2012) A revision of the genus *Cyclophora* and description of *Astrosyne* gen. nov. (Bacillariophyta), two genera with the pyrenoids contained within pseudosepta. *Phycologia* 51: 684–699

Belando MD, Jimenez JF, Marín A, Aboal M (2018) Morphology and molecular phylogeny of *Hyalosynedra lanceolata* sp. nov. and an extended description of *Hyalosynedra* (Bacillariophyta). *Eur J of Phycol* 53: 208–218

Belando MD, Marín A, Aboal M (2012) *Licmophora* species from a Mediterranean hypersaline coastal lagoon (Mar Menor, Murcia, SE Spain) *Nova Hedwigia* 141: 275–288

Cremer H, Sangiorgi F, Wagner–Cremer F, McGee V, Lotter AF, Visscher H (2007) Diatoms (Bacillariophyceae) and Dinoflagellate Cysts (Dinophyceae) from Rookery Bay, Florida, USA. *Caribb J Sci* 43: 23–58

Danielidis D, Mann D (2003) New species and new combinations in the genus *Seminavis* (Bacillariophyta). *Diatom Res* 18: 21–39

Frankovich T, Wachnicka A (2015) Epiphytic Diatoms along Phosphorus and Salinity Gradients in Florida Bay (Florida, USA), an Illustrated Guide and Annotated Checklist In *Microbiology of the Everglades Ecosystem*. In: Entry JA, Gottlieb AD, Jayachandran K, Ogram A (eds) *Microbiology of the Everglades Ecosystem*, CRC Press, Boca Raton, pp. 239–286

Frankovich TA, Ashworth MP, Sullivan MJ, Veselá J, Stacy NI (2016) *Medlinella amphoroidea* gen. et sp. nov. (Bacillariophyta) from the neck skin of Loggerhead sea turtles (*Caretta caretta*). *Phytotaxa* 272: 101–114

- Frankovich TA, Sullivan MJ, Stacy MI (2015) Three new species of *Tursiocola* (Bacillariophyta) from the skin of the West Indian manatee (*Trichechus manatus*). *Phytotaxa* 204: 33–48
- Gaiser EE, Wachnicka AH, Taylor C, Travieso R (2006) Diatom-based water quality performance metrics for Biscayne Bay. Florida International University 1–80
- Garcia M, Talgatti D (2011) Morfologia e distribuição de *Catenula adhaerens* Mereschkowsky (Bacillariophyceae) no sul do Brasil. *Iheringia Ser Bot* 66: 99–108
- Giffen MH (1973) Diatoms of the marine littoral of the Steenberg's Cove in St Helena Bay, Cape Province, South Africa. *Bot Mar* 16: 32–48
- Giffen MH (1975) An account of the littoral diatoms of from Langebaan, Saldahna Bay, Cape Province, South Africa. *Bot Mar* 18: 71–95
- Giffen MH (1976) A further account of the littoral diatoms of the Saldahna Bay Lagoon, Cape Province, South Africa. *Bot Mar* 19: 379–394
- Kaleli MA, Kulikovskiy MS, Solak CN (2017) Some New Records for Marine Diatom Flora of Turkey From Akliman, Sinop (Black Sea) *Turk J Fish Aquat Sc* 17: 1387–1395
- Kaleli A, Krzywda M, Witkowski A, Riaux-Gobin C, Solak CN, Zgłobicka I, Płociński T, Grzonka J, Kurzydłowski KJ, Car A (2018) A new sediment dwelling and epizoic species of *Olifantiella* (Bacillariophyceae), with an account on the genus ultrastructure based on Focused Ion Beam nanocuts. *Fottea* 18: 212–226
- Kim BS, Kim SY, Park J–G, Witkowski A (2017) New Records of the Diatom Species (Bacillariophyta) from the Seaweed and Tidal Flats in Korea. *Environ Biol Res* 35: 604–621
- Lee SS, Gaiser EE, Van de Vijver B, Edlund MB, Spaulding SA (2014) Morphology and typification of *Mastogloia smithii* and *M. lacustris*, with descriptions of two new species from the Florida Everglades and the Caribbean region. *Diatom Res* 29: 325–350
- Lobban CS (2015) A second species of *Microtabella* (Grammatophoraceae, Bacillariophyta) from Guam. *Mar Biodivers Rec* 8: 1–5
- Lobban CS, Ashworth MP (2014) *Hanicella moenia*, gen. et sp. nov., a ribbon-forming diatom (Bacillariophyta) with complex girdle bands, compared to *Microtabella interrupta* and *Rhabdonema* cf. *adriaticum*: Implications for Striatellales, Rhabdonematales, and Grammatophoraceae, fam. nov. *J Phycol* 50: 860–884
- Lobban CS, Ashworth MP, Arai Y, Jordan RW, Theriot EC (2011) Marine necklace-chain Fragilariaceae (Bacillariophyceae) from Guam, including descriptions of *Koernerella* and *Perideraion*, genera nova. *Phycol Res* 59: 175–193
- Lobban CS, Schefter M, Jordan RW, Arai Y, Sasaki A, Theriot EC, Ashworth MP, Ruck EC, Pennesi C (2012) Coral-reef diatoms (Bacillariophyta) from Guam: New records and preliminary

checklist, with emphasis on epiphytic species from farmer–fish territories. *Micronesica* 43: 237–479

Majewska R, Kociolek P, Thomas E, De Stefano M, Santoro M, Bolaños F, Van de Vijver B (2015b) *Chelonicola* and *Poulinea*, two new gomphonemoid diatom genera (Bacillariophyta) living on marine turtles from Costa Rica. *Phytotaxa* 233: 236–250

Majewska R, De Stefano M, Ector L, Bolanos F, Frankovich TA, Sullivan MJ, Ashworth MP, Van de Vijver B (2017b) Two new epizoic *Achnanthes* species (Bacillariophyta) living on marine turtles from Costa Rica *Bot Mar* 60: 303–318

Majewska R, Van de Vijver B, Nasrolahi A, Ehsanpour M, Afkhami M, Bolaños F, Iamunno F, Santoro M, De Stefano M (2017a) Shared epizoic taxa and differences in diatom community structure between green turtles (*Chelonia mydas*) from distant habitats. *Microbial Ecol* 74: 969–978

Majewska R, Bosak S, Frankovich TA, Ashworth MP, Sullivan MJ, Robinson NJ, Lazo-Wasem EA, Pinou T, Nel R, Manning SR, Van de Vijver B (2019) Six new epibiotic *Proschkinia* (Bacillariophyta) species and new insights into the genus phylogeny *Eur J Phycol* 54: 609–631

Majewska R, De Stefano M, Van de Vijver B (2017c) *Labellicula lecohuiana*, a new epizoic diatom species living on green turtles in Costa Rica. *Nova Hedwigia* 146: 23–31

Majewska R, Robert K, Van de Vijver B, Nel R (2019) A new species of *Lucanicum* (Cyclophorales, Bacillariophyta) associated with loggerhead sea turtles from South Africa. *Bot Letters* (publ. online)

Park J, Khim JS, Ohtsuka T, Araki H, Witkowski A, Koh C–H (2012) Diatom assemblages on Nanaura mudflat, Ariake Sea, Japan: With reference to the biogeography of marine benthic diatoms in Northeast Asia. *BotanStud* 53: 105–124

Park J, Khim JS, Ryu J, Koh C–H, Witkowski A (2013) An emended description of the genus *Fogedia* (Bacillariophyceae) with reports of four species new to science from a Korean sand flat. *Phycologia* 52: 437–446

Park JS, Lobban CS, Lee K–W (2018) Diatoms associated with seaweeds from Moen Island in Chuuk Lagoon, Micronesia. *Phytotaxa* 351: 101–140

Riaux–Gobin C, Witkowski A, Ruppel M (2012) *Scalariella* a new genus of monoraphid diatom (Bacillariophyta) with a bipolar distribution. *Fottea* 12: 13–25

Romagnoli T, Totti C, Accoroni S, De Stefano M, Pennesi C (2014) SEM analysis of the epibenthic diatoms on *Eudendrium racemosum* (Hydrozoa) from the Mediterranean Sea. *Turk J Bot* 38: 1–29

Sar EA, Romero OE, Sunesen I (2003) *Cocconeis* Ehrenberg and *Psammococconeis* Garcia (Bacillariophyta) from the Gulf of San Matías, Patagonia, Argentina. *Diatom Res* 18: 79–106

- Sar EA, Sunesen I, Fernandez PV (2007) Marine Diatoms from Buenos Aires coastal waters (Argentina) II Thalassionemataceae and Raphoneidaceae. *Rev Chil Hist Natural* 80: 63–79
- Siqueiros-Beltrones DA, Argumedo-Hernández U, Landa-Cancigno C (2015) Uncommon species diversity values in epiphytic diatom assemblages of the kelp *Eisenia arborea*. *Hidrobiol* 26: 61–76
- Siqueiros-Beltrones DA, Argumedo-Hernández U, López-Fuerte FO (2017) Diversity of benthic diatoms in the Guerrero Negro Lagoon (El Vizcaíno Biosphere Reserve), Baja California Peninsula, Mexico. *Rev Mex Biodiver* 88: 21–35
- Siqueiros-Beltrones DA, Argumedo-Hernández U, Murillo-Jiménez JM, Marmolejo-Rodríguez AJ (2014) Diversidad de diatomeas bentónicas marinas en un ambiente ligeramente enriquecido con elementos potencialmente tóxicos. *Rev Mex Biodiver* 84: 1065–1085
- Siqueiros-Beltrones DA, Hernández-Almeida O (2006) Florística de diatomeas epifitas en un manchón de macroalgas subtropicales. *CICIMAR Océánides* 21: 11–61
- Siqueiros-Beltrones DA, Martínez, YJ (2017) Prospective floristics of epiphytic diatoms on Rhodophyta from the southern Gulf of Mexico. *CICIMAR Océánides* 32: 35–49
- Siqueiros-Beltrones DA, Valenzuela-Romero G, Hernández-Almeida O, Argumedo-Hernández U, López-Fuerte FO (2004) Catalogo iconografico de diatomeas de habitats rocosos y su incidencia en la dieta de abulones (*Haliotis* spp) juvenes de Baja California Sur, México. *CICIMAR Océánides* 19: 29–103
- Stepanek JG, Kociolek JP (2013) Several new species of *Amphora* and *Halamphora* from the western USA. *Diatom Res* 28: 61–76
- Ulanova A, Snoeijs P (2006) *Lunella garyae* sp nov – a new polyhalobous diatom from the English Channel coast. *Diatom Res* 21: 415–426
- Van de Vijver B, Kociolek JP (2018) A new species of *Nagumoea* (Bacillariophyta) from Antarctica, and a further consideration of the systematic position of the genus. *Phytotaxa* 349: 152–158
- Wachnicka AH, Gaiser EE (2007) Characterization of *Amphora* and *Seminavis* from south Florida, USA. *Diatom Res* 22: 387–455
- Witkowski A, Li C, Zgłobicka I, Yu S, Ashworth MP, Dąbek P, Qin S, Tang C, Krzywda M, Ruppel M, et al (2016) Multigene Assessment of Biodiversity of Diatom(Bacillariophyceae) Assemblages from the Littoral Zone of the Bohai and Yellow Seas in Yantai Region of Northeast China with some Remarks on Ubiquitous Taxa. *J Coast Res: Special Issue* 74: 166–195
- Witkowski A, Metzeltin D, Lange-Bertalot H, Bafana G (1997) *Fogedia* gen nov (Bacillariophyceae), a new naviculoid genus from the marine littoral. *Nova Hedwigia* 65: 79–98
