# Supplementary material for: Geographical variation in the diatom communities associated with loggerhead sea turtles (Caretta caretta)
Source: PubMed Central journal article supplement (PMC7390603; doi:10.1371/journal.pone.0236513), 2020-07-29
Supplement: pone.0236513.s002.pdf [file pone.0236513.s002.pdf]

**S2 Table List of 397 taxa observed in the carapace and skin samples of the four sampling localities.** Presumably exclusively epizoic taxa are indicated in bold.

| <b>Taxon</b>                                                       | <b>Croatia</b> | <b>Florida</b> | <b>Greece</b> | <b>South Africa</b> |
|--------------------------------------------------------------------|----------------|----------------|---------------|---------------------|
| <i>Achnanthes brevipes</i> C.Agardh                                | x              |                | x             |                     |
| <b><i>Achnanthes elongata</i> Majewska &amp; Van de Vijver</b>     | x              | x              | x             | x                   |
| <i>Achnanthes</i> cf. <i>danica</i> (Flögel) Grunow                |                |                |               | x                   |
| <i>Achnanthes fimbriata</i> (Grunow) R.Ross                        |                |                |               | x                   |
| <i>Achnanthes manifera</i> Brun                                    |                |                |               | x                   |
| <i>Achnanthes</i> CRO sp.1                                         | x              |                |               | x                   |
| <i>Achnanthes</i> CRO sp.2                                         | x              |                |               | x                   |
| <i>Achnanthes</i> SA sp.1                                          |                |                |               | x                   |
| <i>Achnanthes</i> SA sp.1                                          |                |                |               | x                   |
| <i>Achnanthes</i> SA sp.2                                          |                |                |               | x                   |
| <i>Achnanthidium</i> GRE sp.1                                      |                |                | x             |                     |
| <i>Actinocyclus ehrenbergii</i> Ralfs                              |                | x              | x             |                     |
| <i>Actinocyclus</i> FLO sp.1                                       |                | x              |               |                     |
| <i>Actinocyclus</i> SA sp.1                                        |                |                |               | x                   |
| <i>Amphicocconeis</i> cf. <i>mascarenica</i> Riaux Gobin & Compère |                |                |               | x                   |
| <i>Amphipleura</i> SA sp.1                                         |                |                |               | x                   |
| <i>Amphora bigibba</i> var. <i>interrupta</i> (Grunow) Cleve       |                |                |               | x                   |
| <i>Amphora caribaea</i> Wachnicka & E.E.Gaiser                     |                | x              |               |                     |
| <i>Amphora corpulenta</i> Cleve & Grove                            |                | x              |               |                     |
| <i>Amphora crenulata</i> A.H.Wachnicka & E.E.Gaiser                | x              | x              | x             | x                   |
| <i>Amphora gigantea</i> Grunow                                     |                | x              |               |                     |
| <i>Amphora graeffeana</i> Hendey                                   |                | x              |               |                     |
| <i>Amphora obtusa</i> W.Gregory                                    |                |                |               | x                   |
| <i>Amphora obtusiuscula</i> Grunow                                 |                |                |               | x                   |
| <i>Amphora ostrearia</i> Brébisson ex Kützing                      |                |                | x             |                     |
| <i>Amphora tenerrima</i> Aleem & Hustedt                           |                |                |               | x                   |
| <i>Amphora</i> cf. <i>marina</i> W.Smith                           |                |                | x             |                     |
| <i>Amphora</i> cf. <i>hamata</i> Heiden                            |                |                |               | x                   |
| <i>Amphora</i> cf. <i>wisei</i> (M.M.Salah) Simonsen               |                |                |               | x                   |
| <i>Amphora</i> CRO sp.1                                            | x              |                |               | x                   |
| <i>Amphora</i> CRO sp.2                                            | x              |                |               | x                   |
| <i>Amphora</i> CRO sp.3                                            | x              |                |               |                     |
| <i>Amphora</i> FLO sp.1                                            |                | x              |               | x                   |
| <i>Amphora</i> FLO sp.2                                            |                | x              | x             |                     |
| <i>Amphora</i> GRE sp.1                                            |                |                | x             |                     |
| <i>Amphora</i> GRE sp.2                                            |                |                | x             |                     |
| <i>Amphora</i> GRE sp.3                                            |                |                | x             |                     |
| <i>Amphora</i> GRE sp.4                                            |                |                | x             |                     |

|                                                                            |   |   |   |   |
|----------------------------------------------------------------------------|---|---|---|---|
| <i>Amphora</i> GRE sp.5                                                    |   |   | x |   |
| <i>Amphora</i> SA sp.1                                                     |   |   |   | x |
| <i>Amphora</i> SA sp.2                                                     |   |   |   | x |
| <i>Anaulus</i> SA sp.1                                                     |   |   |   | x |
| <i>Ardissonea formosa</i> (Hantzsch) Grunow                                |   | x |   |   |
| <i>Astartiella</i> SA sp.1                                                 |   |   |   | x |
| <i>Astartiella</i> SA sp.2                                                 |   |   |   | x |
| <i>Austariella admissa</i> (Hustedt) Witkowski, Lange Bertalot & Metzeltin |   |   |   | x |
| <i>Berkeleya fennica</i> Juhlin Dannfelt                                   | x |   | x |   |
| <i>Berkeleya hyalina</i> (Round & M.E.Brooks) E.J.Cox                      |   |   |   | x |
| <i>Berkeleya micans</i> (Lyngbye) Grunow                                   | x |   | x |   |
| <i>Berkeleya scopulorum</i> (Brébisson ex Kützing) E.J.Cox                 | x |   |   |   |
| <i>Biddulphia biddulphiana</i> (J.E.Smith) Boyer                           | x |   |   |   |
| <i>Bifibulatia</i> CRO sp.1                                                |   |   |   |   |
| <i>Brachysira aponina</i> Kützing                                          | x |   |   |   |
| <i>Brachysira estonarium</i> Witkowski, Lange Bertalot & Metzeltin         |   |   | x |   |
| <i>Caloneis excentrica</i> (Grunow) Boyer                                  |   | x |   |   |
| <i>Caloneis fusioides</i> (Grunow) Heiden & Kolbe                          |   |   | x |   |
| <i>Caloneis liber</i> (W.Smith) Cleve                                      | x | x | x | x |
| <i>Caloneis liber</i> var. <i>linearis</i> Cleve                           |   |   | x | x |
| <i>Caloneis</i> FLO sp.1                                                   |   | x |   |   |
| <i>Campylodiscus</i> cf. <i>neofastuosus</i> Ruck & Nakov                  |   |   | x |   |
| <i>Campylodiscus ralfsii</i> W.Smith                                       |   | x |   |   |
| <i>Campylodiscus</i> FLO sp.1                                              |   | x |   |   |
| <i>Campyloneis</i> SA sp.1                                                 |   |   |   | x |
| <i>Carinasigma</i> GRE sp.1                                                |   |   | x |   |
| <i>Catenula exigua</i> K.Robert, Bosak & Van de Vijver                     | x |   |   |   |
| <b><i>Chelonicola</i> SA sp.1</b>                                          |   |   |   | x |
| <i>Climaconeis inflexa</i> (Brébisson ex Kützing) E.J.Cox                  |   |   |   | x |
| <i>Cocconeis convexa</i> M.H.Giffen                                        | x |   |   | x |
| <i>Cocconeis distans</i> W.Gregory                                         |   |   |   | x |
| <i>Cocconeis lineata</i> Ehrenberg                                         | x | x | x | x |
| <i>Cocconeis maxima</i> (Grunow) H.Peragallo & M.Peragallo                 |   |   | x |   |
| <i>Cocconeis molesta</i> Kützing                                           |   |   |   | x |
| <i>Cocconeis pinnata</i> W.Gregory ex Greville                             |   |   |   | x |
| <i>Cocconeis scutellum</i> Ehrenberg var. 1                                |   |   | x |   |
| <i>Cocconeis scutellum</i> Ehrenberg var. 2                                |   |   | x | x |
| <i>Cocconeis scutellum</i> Ehrenberg var. 3                                | x |   | x | x |
| <i>Cocconeis</i> cf. <i>distantula</i> M.H.Giffen                          |   |   |   | x |
| <i>Cocconeis</i> cf. <i>dirupta</i> W.Gregory                              |   |   |   | x |

|                                                                  |   |   |   |   |
|------------------------------------------------------------------|---|---|---|---|
| <i>Cocconeis</i> cf. <i>pediculus</i> Ehrenberg                  | x |   |   |   |
| <i>Cocconeis</i> cf. <i>peltoides</i> Hustedt                    |   |   |   | x |
| <i>Cocconeis</i> cf. <i>sigillata</i> Riaux Gobin & Al Handal    |   |   |   | x |
| <i>Cocconeis</i> CRO sp.1                                        | x |   |   |   |
| <i>Cocconeis</i> CRO sp.2                                        | x |   |   |   |
| <i>Cocconeis</i> CRO sp.3                                        | x |   |   |   |
| <i>Cocconeis</i> CRO sp.4                                        | x |   |   |   |
| <i>Cocconeis</i> FLO sp.1                                        |   | x |   |   |
| <i>Cocconeis</i> GRE sp.1                                        |   |   | x |   |
| <i>Cocconeis</i> SA sp.1                                         |   |   |   | x |
| <i>Cocconeis</i> SA sp.2                                         |   |   |   | x |
| <i>Cocconeis</i> SA sp.3                                         |   |   |   | x |
| <i>Cocconeis</i> SA sp.4                                         |   |   |   | x |
| <i>Cocconeis</i> SA sp.5                                         |   |   |   | x |
| <i>Coscinodiscus</i> GRE sp.1                                    |   |   | x |   |
| <i>Coscinodiscus</i> SA sp.1                                     |   |   |   | x |
| <b><i>Craspedostauros</i> SA sp.1</b>                            |   |   |   | x |
| <b><i>Craspedostauros</i> CRO sp.1</b>                           | x |   |   |   |
| <i>Cyclophora tenuis</i> Castracane                              | x |   |   | x |
| <i>Cyclophora tabellariformis</i> Ashworth & Lobban              |   |   |   | x |
| <i>Cyclotella litoralis</i> Lange & Syvertsen                    |   | x |   |   |
| <i>Cylindrotheca closterium</i> (Ehrenberg) Reimann & J.C.Lewin  |   |   | x |   |
| <i>Cymatosira</i> cf. <i>lorenziana</i> Grunow                   |   | x |   |   |
| <i>Cymatosira</i> SA sp.1                                        |   |   |   | x |
| <i>Cymatosira</i> SA sp.2                                        |   |   |   | x |
| <i>Cymbella hustedtii</i> Krasske                                |   |   | x |   |
| <i>Delphineis</i> cf. <i>minutissima</i> (Hustedt) Simonsen      | x |   |   | x |
| <i>Delphineis</i> SA sp.1                                        |   |   |   | x |
| <i>Dickieia</i> GRE sp.1                                         |   |   | x |   |
| <i>Dimeregramma minor</i> (Gregory) Ralfs in Pritchard           | x |   | x |   |
| <i>Diploneis bombus</i> (Ehrenberg) Ehrenberg                    |   |   | x |   |
| <i>Diploneis suborbicularis</i> (W.Gregory) Cleve                |   | x |   |   |
| <i>Diploneis</i> cf. <i>notabilis</i> (Greville) Cleve           |   |   | x |   |
| <i>Diploneis</i> cf. <i>sejuncta</i> (A.W.F.Schmidt) E.Jørgensen | x |   |   |   |
| <i>Diploneis</i> CRO sp.1                                        | x |   |   |   |
| <i>Diploneis</i> CRO sp.2                                        | x | x | x | x |
| <i>Diploneis</i> CRO sp.3                                        | x |   |   |   |
| <i>Diploneis</i> CRO sp.4                                        | x |   |   |   |
| <i>Diploneis</i> CRO sp.5                                        | x |   |   |   |
| <i>Diploneis</i> CRO sp.6                                        | x |   |   |   |
| <i>Diploneis</i> CRO sp.7                                        | x |   |   |   |
| <i>Diploneis</i> CRO sp.8                                        | x |   |   |   |
| <i>Diploneis</i> CRO sp.9                                        | x |   |   |   |
| <i>Diploneis</i> GRE sp.1                                        |   |   | x |   |

|                                                                                 |   |   |   |   |
|---------------------------------------------------------------------------------|---|---|---|---|
| <i>Diploneis</i> GRE sp.2                                                       |   | x |   |   |
| <i>Diploneis</i> SA sp.1                                                        |   |   |   | x |
| <i>Diploneis</i> SA sp.2                                                        |   |   |   | x |
| <i>Diploneis</i> SA sp.3                                                        |   |   |   | x |
| <i>Diploneis</i> SA sp.4                                                        |   |   |   | x |
| <i>Diploneis</i> SA sp.5                                                        |   |   |   | x |
| <i>Discostella</i> CRO sp.1                                                     | x |   | x |   |
| <i>Discostella</i> GRE sp.1                                                     |   |   | x |   |
| <i>Encyonema</i> CRO sp.1                                                       | x |   |   |   |
| <i>Encyonema minutum</i> (Hilse) D.G.Mann                                       | x |   |   |   |
| <i>Epithemia constricta</i> Brébisson                                           |   |   | x |   |
| <i>Epithemia musculus</i> Kützing                                               | x |   |   |   |
| <i>Epithemia pacifica</i> (Krammer) Lobban & J.S.Park                           |   |   | x |   |
| <i>Epithemia</i> SA sp.1                                                        |   |   |   | x |
| <i>Falcula</i> SA sp.1                                                          |   |   |   | x |
| <i>Fallacia</i> CRO sp.1                                                        | x |   | x | x |
| <i>Fallacia</i> CRO sp.2                                                        | x |   |   | x |
| <i>Fallacia forcipata</i> (Greville) Stickle & D.G.Mann                         |   |   | x |   |
| <i>Fallacia schoemana</i> (Foged) Witkowski                                     |   |   |   | x |
| <i>Fallacia subforcipata</i> (Hustedt) D.G.Mann                                 |   |   | x |   |
| <i>Fallacia</i> SA sp.1                                                         |   |   |   | x |
| <i>Fogedia giffeniana</i> (Foged) Witkowski, Lange Bertalot, Metzeltin & Bafana |   |   | x |   |
| <i>Fogedia heterovalvata</i> Witkowski, Metzeltin & Lange Bertalot              |   |   |   | x |
| <i>Fragilaria</i> CRO sp.1                                                      | x |   |   |   |
| <i>Fragilaria</i> FLO sp.1                                                      |   |   | x |   |
| <i>Fragilariopsis</i> SA sp.1                                                   |   |   |   | x |
| <i>Glyphodesmis</i> cf. <i>distans</i> (W.Gregory) Grunow                       | x |   |   |   |
| <i>Gomphonema</i> GRE sp.1                                                      |   |   | x |   |
| <i>Gomphonema micropus</i> Kützing                                              |   |   | x |   |
| <i>Gomphonemopsis pseudexigua</i> Medlin                                        | x |   | x |   |
| <i>Grammatophora</i> cf. <i>marina</i> (Lyngbye) Kützing                        |   |   | x |   |
| <i>Grammatophora</i> CRO sp.1                                                   | x |   |   |   |
| <i>Grammatophora</i> FLO sp.1                                                   |   |   | x |   |
| <i>Grammatophora</i> FLO sp.2                                                   |   |   | x |   |
| <i>Grammatophora</i> FLO sp.3                                                   |   |   | x | x |
| <i>Grammatophora</i> GRE sp.1                                                   |   |   | x |   |
| <i>Grammatophora undulata</i> Ehrenberg                                         |   |   |   | x |
| <i>Gyrosigma tenuissimum</i> (W.Smith) J.W.Griffith & Henfrey                   |   |   |   | x |
| <i>Gyrosigma</i> GRE sp.1                                                       |   |   | x |   |
| <i>Halamphora kolbei</i> (Aleem) Álvarez Blanco & S.Blanco                      | x |   | x | x |
| <i>Halamphora</i> cf. <i>cejudoae</i> Álvarez Blanco & S.Blanco                 | x |   | x | x |

|                                                                                   |   |   |   |  |   |
|-----------------------------------------------------------------------------------|---|---|---|--|---|
| <i>Halamphora</i> cf. <i>coffeaeformis</i> (C.Agardh)<br>Levkov                   |   |   | x |  | x |
| <i>Halamphora</i> cf. <i>holsatica</i> (Hustedt) Levkov                           |   |   | x |  | x |
| <i>Halamphora</i> cf. <i>turgida</i> (Gregory) Levkov                             |   |   |   |  | x |
| <i>Haslea</i> GRE sp.1                                                            |   |   | x |  |   |
| <i>Haslea</i> SA sp.1                                                             |   |   |   |  | x |
| <i>Haslea nautica</i> (Cholnoky) Giffen                                           |   |   |   |  | x |
| <i>Hippodonta linearis</i> (Østrup) Lange Bertalot,<br>Metzeltin & Witkowski      |   |   |   |  | x |
| <i>Hyalosira hesperia</i> Álvarez Blanco & S.Blanco                               | x |   | x |  | x |
| <i>Hyalosira tropicalis</i> J.N.Navarro                                           |   |   |   |  | x |
| <i>Hyalosira</i> SA sp.1                                                          |   |   |   |  | x |
| <i>Hyalosynedra hyalina</i> (Grunow) Álvarez Blanco<br>& S.Blanco                 | x | x |   |  | x |
| <i>Hyalosynedra laevigata</i> (Grunow) D.M.Williams<br>& Round                    | x | x | x |  | x |
| <i>Hyalosynedra lanceolata</i> Belando, Jiménez &<br>Aboal                        | x | x |   |  |   |
| <i>Hyalosynedra</i> CRO sp. 1                                                     | x |   |   |  | x |
| <i>Karayevia ploenensis</i> (Hustedt) Bukhtiyarova                                |   |   | x |  |   |
| <i>Koernerella reticostata</i> (Körner) M.P.Ashworth,<br>C.S.Lobban & E.C.Theriot |   |   |   |  | x |
| <i>Kolbesia</i> aff. <i>sinica</i> Krzywda, Witkowski &<br>Ch.Li                  | x |   |   |  |   |
| <i>Lancineis fatula</i> (K.E.Lohman) G.W.Andrews                                  |   |   |   |  | x |
| <i>Licmophora abbreviata</i> C.Agardh                                             | x |   |   |  |   |
| <i>Licmophora debilis</i> (Kützing) Grunow                                        | x |   | x |  |   |
| <i>Licmophora ehrenbergii</i> (Kützing) Grunow                                    |   |   |   |  | x |
| <i>Licmophora flabellata</i> (Greville) C.Agardh                                  |   |   | x |  | x |
| <i>Licmophora gracilis</i> (Ehrenberg) Grunow                                     |   |   |   |  | x |
| <i>Licmophora hyalina</i> (Kützing) Grunow                                        | x |   |   |  |   |
| <i>Licmophora paradoxa</i> (Lyngbye) C.Agardh                                     |   |   | x |  | x |
| <i>Licmophora proboscidea</i> Mereschkowsky                                       | x |   | x |  |   |
| <i>Licmophora remulus</i> (Grunow) Grunow                                         |   |   | x |  | x |
| <i>Licmophora</i> cf. <i>curvata</i> Lobban, Tharngan &<br>Ashworth               |   |   |   |  | x |
| <i>Licmophora</i> cf. <i>fluticulata</i> Lobban, Schefter &<br>Ruck               |   |   |   |  | x |
| <i>Licmophora</i> cf. <i>gracilis</i> (Ehrenberg) Grunow                          |   |   |   |  | x |
| <i>Licmophora</i> cf. <i>paradoxa</i> (Lyngbye) C.Agardh                          |   |   |   |  | x |
| <i>Licmophora</i> CRO sp.1                                                        | x |   |   |  |   |
| <i>Licmophora</i> SA sp. 1                                                        |   |   |   |  | x |
| <i>Licmophora</i> SA sp. 2                                                        |   |   |   |  | x |
| <i>Licmophora</i> SA sp. 3                                                        |   |   |   |  | x |
| <i>Licmophora</i> SA sp. 4                                                        |   |   |   |  | x |
| <i>Licmophora</i> SA sp. 5                                                        |   |   |   |  | x |
| <i>Licmophora</i> SA sp. 6                                                        |   |   |   |  | x |

|                                                                   |   |   |   |   |   |
|-------------------------------------------------------------------|---|---|---|---|---|
| <i>Lucanicum ashworthianum</i> Majewska, K.Robert & Van de Vijver |   |   |   |   | X |
| <i>Lyrella cf. abrupta</i> (W.Gregory) D.G.Mann                   |   |   | X |   |   |
| <i>Lyrella cf. lyroides</i> (Hendey) D.G.Mann                     |   |   | X |   |   |
| <i>Mastogloia angulata</i> F.W.Lewis                              | X | X |   |   |   |
| <i>Mastogloia apiculata</i> W.Smith                               |   |   |   |   | X |
| <i>Mastogloia bahamensis</i> Cleve                                |   |   | X |   |   |
| <i>Mastogloia binotata</i> (Grunow) Cleve                         | X | X |   |   | X |
| <i>Mastogloia biocellata</i> (Grunow) G.Novarino & A.R.Muftah     |   |   | X | X |   |
| <i>Mastogloia corsicana</i> Grunow                                |   |   | X |   | X |
| <i>Mastogloia cribrosa</i> Grunow                                 |   |   | X |   |   |
| <i>Mastogloia crucicula</i> (Grunow) Cleve                        | X | X | X |   | X |
| <i>Mastogloia cuneata</i> (Meister) Simonsen                      | X |   |   | X | X |
| <i>Mastogloia cyclops</i> Voigt                                   |   |   |   |   | X |
| <i>Mastogloia depressa</i> Hustedt                                |   |   | X |   |   |
| <i>Mastogloia elegans</i> Lewis                                   |   |   | X |   |   |
| <i>Mastogloia emarginata</i> Hustedt                              |   |   | X |   | X |
| <i>Mastogloia erythraea</i> Grunow                                |   |   | X |   |   |
| <i>Mastogloia erythraea</i> var. <i>grunowii</i> Foged            |   |   | X |   | X |
| <i>Mastogloia fimbriata</i> (T.Brightwell) Grunow                 |   |   | X |   |   |
| <i>Mastogloia graciloides</i> Hustedt                             | X |   |   |   |   |
| <i>Mastogloia horvathiana</i> Grunow                              |   |   | X |   |   |
| <i>Mastogloia ignorata</i> Hustedt                                |   |   |   | X |   |
| <i>Mastogloia lacrimata</i> Voigt                                 |   |   | X |   |   |
| <i>Mastogloia manokwariensis</i> Chohnoky                         | X |   |   | X |   |
| <i>Mastogloia ovalis</i> A.Schmidt                                |   |   |   |   | X |
| <i>Mastogloia paradoxa</i> Grunow                                 |   |   |   | X |   |
| <i>Mastogloia pseudolacrimata</i> T.A.Yohn & R.A.Gibson           |   |   | X |   |   |
| <i>Mastogloia pumila</i> (Grunow) Cleve                           | X |   |   | X |   |
| <i>Mastogloia punctifera</i> Brun                                 |   |   | X |   |   |
| <i>Mastogloia pusilla</i> Grunow                                  | X | X | X |   |   |
| <i>Mastogloia robusta</i> Hustedt                                 |   |   | X | X |   |
| <i>Mastogloia</i> aff. <i>ovalis</i> A.Schmidt                    | X | X | X |   | X |
| <i>Mastogloia</i> cf. <i>acutiuscula</i> Grunow                   | X |   |   |   |   |
| <i>Mastogloia</i> cf. <i>grunowii</i> A.Schmidt                   |   |   |   | X |   |
| <i>Mastogloia</i> cf. <i>pusilla</i> Grunow                       |   |   |   | X |   |
| <i>Mastogloia</i> CRO sp.1                                        | X |   |   |   |   |
| <i>Mastogloia</i> CRO sp.2                                        | X |   |   |   |   |
| <i>Mastogloia</i> FLO sp.1                                        |   |   | X |   |   |
| <i>Mastogloia</i> FLO sp.2                                        |   |   | X |   |   |
| <i>Mastogloia</i> FLO sp.3                                        |   |   | X |   |   |
| <i>Mastogloia</i> FLO sp.4                                        |   |   | X |   |   |
| <i>Mastogloia</i> FLO sp.5                                        |   |   | X |   |   |
| <i>Mastogloia</i> FLO sp.6                                        |   |   | X |   |   |

|                                                                                       |   |   |   |   |
|---------------------------------------------------------------------------------------|---|---|---|---|
| <i>Mastogloia</i> SA sp.1                                                             |   |   |   | X |
| <i>Mastogloia</i> SA sp.2                                                             |   |   |   | X |
| <b><i>Medlinella amphoroidea</i> Frankovich, Ashworth &amp; M.J. Sullivan</b>         |   |   | X |   |
| <i>Melosira moniliformis</i> C.Agardh                                                 | X |   | X |   |
| <i>Microtabella interrupta</i> (Ehrenberg) Round                                      |   | X |   |   |
| <i>Microtabella</i> cf. <i>delicatula</i> (Kützing) Round                             | X | X | X | X |
| <i>Nagumoea</i> CRO sp. 1                                                             | X |   |   |   |
| <i>Nanofrustulum shiloi</i> (J.J.Lee, Reimer & McEnery) Round, Hallsteinsen & Paasche | X |   | X |   |
| <i>Navicula agatkae</i> Witkowski                                                     |   |   | X |   |
| <i>Navicula directa</i> (W.Smith) Ralfs                                               |   |   |   | X |
| <i>Navicula gregaria</i> Donkin                                                       |   |   | X |   |
| <i>Navicula</i> cf. <i>cancellata</i> Donkin                                          |   |   | X | X |
| <i>Navicula</i> cf. <i>directa</i>                                                    |   | X | X |   |
| <i>Navicula</i> cf. <i>kariana</i> Grunow                                             | X |   |   |   |
| <i>Navicula</i> cf. <i>korzeniewskii</i> Witkowski                                    | X |   |   |   |
| <i>Navicula</i> cf. <i>pavillardii</i> Hustedt                                        |   |   | X | X |
| <i>Navicula</i> cf. <i>perminuta</i> Grunow                                           | X |   | X | X |
| <i>Navicula</i> cf. <i>phyllepta</i> Kützing                                          |   |   | X |   |
| <i>Navicula</i> cf. <i>subagnita</i> Proshkina Lavrenko                               |   |   | X |   |
| <i>Navicula</i> CRO sp.1                                                              | X | X |   | X |
| <i>Navicula</i> CRO sp.2                                                              | X |   |   |   |
| <i>Navicula</i> CRO sp.3                                                              | X |   |   |   |
| <i>Navicula</i> CRO sp.4                                                              | X |   |   |   |
| <i>Navicula</i> CRO sp.5                                                              | X |   |   |   |
| <i>Navicula</i> CRO sp.6                                                              | X |   |   |   |
| <i>Navicula</i> CRO sp.7                                                              | X | X | X |   |
| <i>Navicula</i> CRO sp.8                                                              | X |   |   |   |
| <i>Navicula</i> FLO sp.1                                                              |   | X |   |   |
| <i>Navicula</i> FLO sp.2                                                              |   | X |   |   |
| <i>Navicula</i> FLO sp.3                                                              |   | X |   |   |
| <i>Navicula</i> GRE sp.1                                                              |   |   | X |   |
| <i>Navicula</i> GRE sp.2                                                              |   |   | X |   |
| <i>Navicula</i> GRE sp.3                                                              |   |   | X |   |
| <i>Navicula</i> GRE sp.4                                                              |   |   | X |   |
| <i>Navicula</i> SA sp.1                                                               |   |   |   | X |
| <i>Navicula</i> SA sp.2                                                               |   |   |   | X |
| <i>Navicula</i> SA sp.3                                                               |   |   |   | X |
| <i>Navicula</i> SA sp.4                                                               |   |   |   | X |
| <i>Navicula</i> SA sp.5                                                               |   |   |   | X |
| <i>Navicula</i> SA sp.6                                                               |   |   |   | X |
| <i>Neosynedra provincialis</i> (Grunow) D.M.Williams & Round                          | X |   |   | X |
| <i>Neosynedra tortuosa</i> (Grunow) D.M.Williams & Round                              |   |   |   | X |
| <i>Nitzschia angularis</i> W.Smith                                                    |   | X |   |   |

|                                                                  |   |   |   |   |
|------------------------------------------------------------------|---|---|---|---|
| <i>Nitzschia amabilis</i> H.Suzuki                               | x |   | x | x |
| <i>Nitzschia dissipata</i> (Kützing) Rabenhorst                  |   |   | x |   |
| <i>Nitzschia scalpelliformis</i> Grunow                          | x | x | x | x |
| <i>Nitzschia sicula</i> (Castracane) Hustedt                     | x |   |   |   |
| <i>Nitzschia sigma</i> (Kützing) W.Smith                         |   |   | x |   |
| <i>Nitzschia spathulata</i> Brébisson ex W.Smith                 |   |   | x | x |
| <i>Nitzschia valdestriata</i> Aleem & Hustedt                    | x |   |   |   |
| <i>Nitzschia ventricosa</i> Kitton                               |   |   |   | x |
| <i>Nitzschia</i> cf. <i>acicularis</i> (Kützing) W.Smith         |   |   |   | x |
| <i>Nitzschia</i> cf. <i>bremensis</i> Hustedt                    | x |   |   |   |
| <i>Nitzschia</i> cf. <i>inconspicua</i> Grunow                   | x |   | x | x |
| <i>Nitzschia</i> cf. <i>longissima</i> (Brébisson) Ralfs         | x | x |   |   |
| <i>Nitzschia</i> cf. <i>agnita</i> Hustedt                       |   |   |   | x |
| <i>Nitzschia</i> cf. <i>angustatula</i> Lange Bertalot           |   |   |   | x |
| <i>Nitzschia</i> CRO sp.1                                        | x |   |   |   |
| <i>Nitzschia</i> CRO sp.2                                        | x | x | x | x |
| <i>Nitzschia</i> CRO sp.3                                        | x |   |   |   |
| <i>Nitzschia</i> CRO sp.4                                        | x |   |   |   |
| <i>Nitzschia</i> CRO sp.5                                        | x |   |   |   |
| <i>Nitzschia</i> CRO sp.6                                        | x |   |   |   |
| <i>Nitzschia</i> FLO sp.1                                        |   | x |   |   |
| <i>Nitzschia</i> FLO sp.2                                        |   | x |   |   |
| <i>Nitzschia</i> FLO sp.3                                        |   | x |   |   |
| <i>Nitzschia</i> GRE sp.1                                        |   |   | x |   |
| <i>Nitzschia</i> GRE sp.2                                        |   |   | x |   |
| <i>Nitzschia</i> GRE sp.3                                        |   | x | x |   |
| <i>Nitzschia</i> SA sp.1                                         |   |   |   | x |
| <i>Nitzschia</i> SA sp.2                                         |   |   |   | x |
| <i>Nitzschia</i> SA sp.3                                         |   |   |   | x |
| <i>Odontella</i> CRO sp.1                                        | x |   |   |   |
| <i>Oestrupia grandis</i> M.K.Hein & B.M.Winsborough              |   | x |   |   |
| <i>Olifantiella</i> cf. <i>mascarenica</i> Riaux Gobin & Compère | x |   | x |   |
| <i>Opephora pacifica</i> (Grunow) Petit                          |   |   | x |   |
| <i>Opephora</i> GRE sp.1                                         |   |   | x |   |
| <i>Opephora</i> GRE sp.2                                         |   |   | x |   |
| <i>Opephora</i> GRE sp.3                                         |   |   | x |   |
| <i>Pantocsekiella ocellata</i> (Pantocsek) K.T.Kiss & Ács        |   |   | x |   |
| <i>Paralia sulcata</i> (Ehrenberg) Cleve                         | x |   | x |   |
| <i>Parlibellus berkeleyi</i> (Kützing) E.J.Cox                   | x |   |   |   |
| <i>Parlibellus</i> SA sp.1                                       |   |   |   | x |
| <i>Parlibellus</i> SA sp.2                                       |   |   |   | x |
| <i>Pauliella</i> cf. <i>taeniata</i> (Grunow) Round & Basson     |   |   |   | x |
| <i>Pauliella taeniata</i> (Grunow) Round & Basson                |   |   |   | x |
| <i>Plagiodiscus nervatus</i> Grunow                              |   |   |   | x |



|                                                                                    |   |   |   |   |
|------------------------------------------------------------------------------------|---|---|---|---|
| <i>Plagiotropis lepidoptera</i> var. <i>proboscidea</i> (Cleve)<br>Reimer          |   |   | x |   |
| <i>Plagiotropis</i> SA sp. 1                                                       |   |   |   | x |
| <i>Planothidium kaetherobertianum</i> Van de Vijver<br>& Bosak                     | x |   |   |   |
| <i>Planothidium</i> GRE sp.1                                                       |   |   | x |   |
| <i>Planothidium</i> GRE sp.2                                                       |   |   | x |   |
| <i>Planothidium</i> SA sp.1                                                        |   |   |   | x |
| <i>Planothidium</i> SA sp.2                                                        |   |   |   | x |
| <i>Pleurosigma</i> GRE sp.1                                                        |   |   | x |   |
| <i>Podocystis spathulata</i> (Shadbolt) Van Heurck                                 |   |   |   | x |
| <b><i>Poulinea</i> CRO sp.1</b>                                                    | x |   | x |   |
| <b><i>Poulinea</i> CRO sp.2</b>                                                    | x | x | x |   |
| <b><i>Proschkinia sulcata</i> Majewska, Van de Vijver<br/>&amp; Bosak</b>          | x |   |   |   |
| <b><i>Proschkinia vergostriata</i> Frankovich, Ashworth<br/>&amp; M.J.Sullivan</b> | x |   | x | x |
| <i>Proschkinia</i> GRE sp.1                                                        |   |   | x | x |
| <i>Proschkinia</i> SA sp.1                                                         |   |   |   | x |
| <i>Psammodictyon coarctata</i> (Grunow) Mann                                       | x | x | x | x |
| <i>Psammodictyon</i> cf. <i>panduriforme</i> (W.Gregory)<br>D.G.Mann               | x |   |   | x |
| <i>Psammodictyon</i> SA sp. 1                                                      |   |   |   | x |
| <i>Psammodiscus</i> cf. <i>nitidus</i> (W.Gregory) Round &<br>D.G.Mann             | x |   |   |   |
| <i>Pseudostaurosira</i> GRE sp. 1                                                  |   |   | x |   |
| <i>Rhabdonema adriaticum</i> Kützing                                               |   |   | x |   |
| <i>Rhaphoneis capensis</i> A.W.F.Schmidt                                           |   |   |   | x |
| <i>Rhopalodia acuminata</i> Krammer                                                | x |   | x |   |
| <i>Seminavis basilica</i> Danielidis                                               | x |   |   |   |
| <i>Seminavis cyrtorapha</i> A.H.Wachnicka &<br>E.E.Gaiser                          |   | x |   |   |
| <i>Seminavis delicatula</i> Wachnicka & Gaiser                                     |   |   |   | x |
| <i>Seminavis insignis</i> Álvarez Blanco & S.Blanco                                |   |   | x |   |
| <i>Seminavis robusta</i> D.B.Danielidis & D.G.Mann                                 |   |   | x |   |
| <i>Seminavis strigosa</i> (Hustedt) Danieledis &<br>Economou Amilli                | x | x | x |   |
| <i>Seminavis</i> cf. <i>delicatula</i> Wachnicka & Gaiser                          |   | x |   | x |
| <i>Seminavis</i> cf. <i>obtusiuscula</i> (Grunow) Danieledis<br>& D.G.Mann         |   |   |   | x |
| <i>Seminavis</i> GRE sp.1                                                          |   |   | x |   |
| <i>Seminavis</i> GRE sp.2                                                          |   |   | x |   |
| <i>Seminavis</i> SA sp.1                                                           |   |   |   | x |
| <i>Seminavis</i> SA sp.2                                                           |   |   |   | x |
| <i>Stauronella indubitabilis</i> Lange Bertalot &<br>S.I.Genkal                    |   |   | x |   |
| <i>Staurosiralla</i> SA sp.1                                                       |   |   |   | x |

|                                                                                       |   |   |   |
|---------------------------------------------------------------------------------------|---|---|---|
| <i>Striatella unipunctata</i> (Lyngbye) C.Agardh                                      | x |   | x |
| <i>Surirella</i> CRO sp.1                                                             | x |   |   |
| <i>Synedra bacillaris</i> (Grunow) Hustedt                                            |   | x |   |
| <i>Synedra commutata</i> Grunow                                                       | x |   |   |
| <i>Synedra</i> cf. <i>fulgens</i> (Greville) W.Smith                                  |   |   | x |
| <i>Synedrosphenia</i> FLO sp. 1                                                       |   | x |   |
| <i>Tabularia affinis</i> (Kützing) Snoeijs                                            |   | x |   |
| <i>Tabularia fasciculata</i> (C.Agardh) D.M.Williams & Round                          |   |   | x |
| <i>Tabularia tabulata</i> (C.Agardh) Snoeijs                                          |   |   | x |
| <i>Tabularia</i> cf. <i>investiens</i> (W.Smith) D.M.Williams & Round                 | x |   | x |
| <i>Tabularia</i> cf. <i>waernii</i> P.Snoeijs                                         |   |   | x |
| <i>Tabularia</i> CRO sp.1                                                             | x |   |   |
| <i>Tabularia</i> FLO sp.1                                                             |   | x |   |
| <i>Thalassionema frauenfeldii</i> (Grunow) Tempère & Peragallo                        | x |   | x |
| <i>Thalassiosira</i> CRO sp. 1                                                        | x |   | x |
| <i>Toxarium hennedyanum</i> (Gregory) Pelletan                                        |   | x |   |
| <i>Toxarium undulatum</i> Bailey                                                      | x |   |   |
| <i>Trachyneis aspera</i> (Ehrenberg) Cleve                                            |   |   | x |
| <i>Trachysphenia australis</i> P.Petit                                                |   |   | x |
| <i>Trachysphenia</i> FLO sp.1                                                         |   | x |   |
| <i>Tryblionella compressa</i> (Bailey) Poulin                                         | x |   | x |
| <i>Tryblionella</i> CRO sp.1                                                          | x |   |   |
| <i>Tryblionella granulata</i> (Grunow) D.G.Mann                                       |   |   | x |
| <i>Tryblionella lanceola</i> Grunow                                                   |   |   | x |
| <i>Tryblionella pararostrata</i> (Lange Bertalot) Clavero & Hernández Mariné          |   |   | x |
| <i>Tryblionella</i> SA sp.1                                                           |   |   | x |
| <i>Tryblionella apiculata</i> W.Gregory                                               |   |   | x |
| <i>Tryblionella persuadens</i> (Cholnoki) K.P.Cavalcante, P.I.Tremarin & T.A.V.Ludwig |   |   | x |
| <i>Ulnaria delicatissima</i> (W.Smith) Aboal & P.C.Silva                              |   |   | x |
