# Supplementary material for: Geographical variation in the diatom communities associated with loggerhead sea turtles (Caretta caretta)
Source: PubMed Central journal article supplement (PMC7390603; doi:10.1371/journal.pone.0236513), 2020-07-29
Supplement: pone.0236513.s003.pdf [file pone.0236513.s003.pdf]

**S3 Table similarity analysis of loggerhead epizoic diatom assemblages within each sampling locality – typical species.** SIMPER analysis was based on Bray-Curtis similarity, 70% cut off, taxa cumulatively contributing to the similarity over 70% are shown. Croatia (CRO), Greece (GRE), South Africa (SA), Florida (FLO)

| Species                                            | Average Abundance | Average Similarity | Dissimilarity /SD | Contribution n % | Cumulative contribution |
|----------------------------------------------------|-------------------|--------------------|-------------------|------------------|-------------------------|
| <b>Croatia - average similarity = 21,05</b>        |                   |                    |                   |                  |                         |
| <i>Poulinea</i> CRO sp.1                           | 3,71              | 3,44               | 0,98              | 16,34            | 16,34                   |
| <i>Poulinea</i> CRO sp.2                           | 5,37              | 2,71               | 0,98              | 12,87            | 29,21                   |
| <i>Amphora crenulata</i>                           | 3,54              | 2,62               | 0,96              | 12,45            | 41,66                   |
| <i>Nitzschia</i> CRO sp.2                          | 3,89              | 1,72               | 0,63              | 8,18             | 49,84                   |
| <i>Neosynedra provincialis</i>                     | 1,97              | 1,51               | 0,62              | 7,16             | 57                      |
| <i>Berkeleya fennica</i>                           | 3,24              | 1,44               | 0,62              | 6,84             | 63,83                   |
| <i>Licmophora debilis</i>                          | 1,33              | 1,03               | 0,6               | 4,88             | 68,71                   |
| <i>Tabularia</i> cf. <i>investiens</i>             | 1,46              | 0,9                | 1,15              | 4,27             | 72,98                   |
| <i>Hyalosira hesperia</i>                          | 1,52              | 0,73               | 0,62              | 3,47             | 76,45                   |
| <b>Florida - average similarity= 60,36</b>         |                   |                    |                   |                  |                         |
| <i>Hyalosynedra laevigata</i>                      | 17,56             | 45,6               | 6,11              | 75,56            | 75,56                   |
| <b>Greece carapace - average similarity: 57,83</b> |                   |                    |                   |                  |                         |
| <i>Nitzschia</i> cf. <i>incospicua</i>             | 9,61              | 10,22              | 1,8               | 17,68            | 17,68                   |
| <i>Nitzschia</i> CRO sp.2                          | 7,38              | 8,65               | 3,9               | 14,96            | 32,63                   |
| <i>Cocconeis lineata</i>                           | 6,45              | 8,23               | 5,79              | 14,24            | 46,87                   |
| <i>Navicula</i> cf. <i>pavillardii</i>             | 4,29              | 5,78               | 6                 | 10               | 56,87                   |
| <i>Navicula</i> cf. <i>perminuta</i>               | 4,29              | 4,68               | 4,58              | 8,09             | 64,96                   |
| <i>Amphora crenulata</i>                           | 4,36              | 4,36               | 2,92              | 7,54             | 72,5                    |
| <i>Seminavis insignis</i>                          | 2,18              | 1,99               | 2,32              | 3,44             | 75,94                   |
| <b>Greece skin - average similarity: 62,11</b>     |                   |                    |                   |                  |                         |
| <i>Nitzschia</i> CRO sp.2                          | 10,46             | 15,46              | 2,72              | 24,89            | 24,89                   |
| <i>Navicula</i> GRE sp.2                           | 6,64              | 11,04              | 12,95             | 17,77            | 42,66                   |
| <i>Medlinella amphoroidea</i>                      | 8                 | 10,31              | 2,48              | 16,6             | 59,26                   |
| <i>Proschkinia</i> CRO sp.2                        | 6,42              | 8,04               | 1,79              | 12,94            | 72,2                    |
| <b>South Africa - average similarity = 49,32</b>   |                   |                    |                   |                  |                         |
| <i>Chelonicola</i> SA sp. 1                        | 13,46             | 25,35              | 3,45              | 51,4             | 51,4                    |
| <i>Nitzschia</i> cf. <i>incospicua</i>             | 9,05              | 12,86              | 1,12              | 26,07            | 77,47                   |
